# MIND TO MIND

Creative writing that explores the abstract side  
of our profession and our lives

*Carol Wiley Cassella, M.D., Editor*

## Anesthesia Checklist

Audrey Shafer, M.D.\*

### A Anesthesia Checklist

Prepare:

- machines and supplies as an extension of you  
a connection, so you can hear your unconscious patient  
talk to you in ways profound and vital

Confirm:

- the patient's identity  
that web of relationships, experiences earned or yearned  
spun with a thousand threads, some frayed, some hidden  
whose innermost knot is mystery

Acknowledge:

- the patient's fear tethered like a beast in a nearly sealed cavern  
ready to rouse, frenzied and wild, especially at the call: *open your eyes!*
- the patient's gift, wrapped in wariness by the family  
yet inside nestles trust, shy at being given to you, a stranger

Ensure:

- the surgeon, looking at you, eyes above masks, sees you  
and sees the nurse

\*Stanford University School of Medicine and Veterans Affairs Palo Alto Health Care System, Palo Alto, California. [ashafer@stanford.edu](mailto:ashafer@stanford.edu)  
Accepted for publication August 23, 2011.

## Consider:

- the patient's wellbeing  
translated into the pulse of ocean waves  
reassuring in its relentlessness
- what to do if the ocean stops

## Verify:

- your readiness to stick, suck, squeeze, switch, screw, twist, tie,  
probe, poke, push, plunge, lift, click, wipe, glide, corral,  
inflate, deflate, placate, titrate, direct, triple check and  
above all, listen

## Render:

- yourself as a wingspread bird set to soar on thermals  
adjusting to the tiniest puffs  
even in the middle of the bright blue sky
